# Supplementary material for: Probing of Interactions of Magnetite Nanoparticles Coated with Native and Aminated Starch with a DPPC Model Membrane
Source: MDPI journal article supplement (doi:10.3390/ijms22115939), 2021-05-31
Supplement: s1 [file s1]

## SUPPLEMENTARY MATERIALS

### Probing of Interactions of the Magnetite Nanoparticles Coated with Native and Aminated Starch with the DPPC Model Membrane

Emilia Piosik <sup>1,\*</sup>, Aleksandra Zaryczniak <sup>1</sup>, Kinga Mylkie <sup>2</sup> and Marta Ziegler-Borowska <sup>2,\*</sup>

<sup>1</sup> Faculty of Material Engineering and Technical Physics, Poznan University of Technology, Piotrowo 3, 60-965 Poznan, Poland;

<sup>2</sup> Faculty of Chemistry, Nicolaus Copernicus University in Torun, Gagarina 7, 87-100 Torun, Poland;

\* Correspondence: emilia.piosik@put.poznan.pl (E.P.); martaz@umk.pl (M.Z.-B.)

---

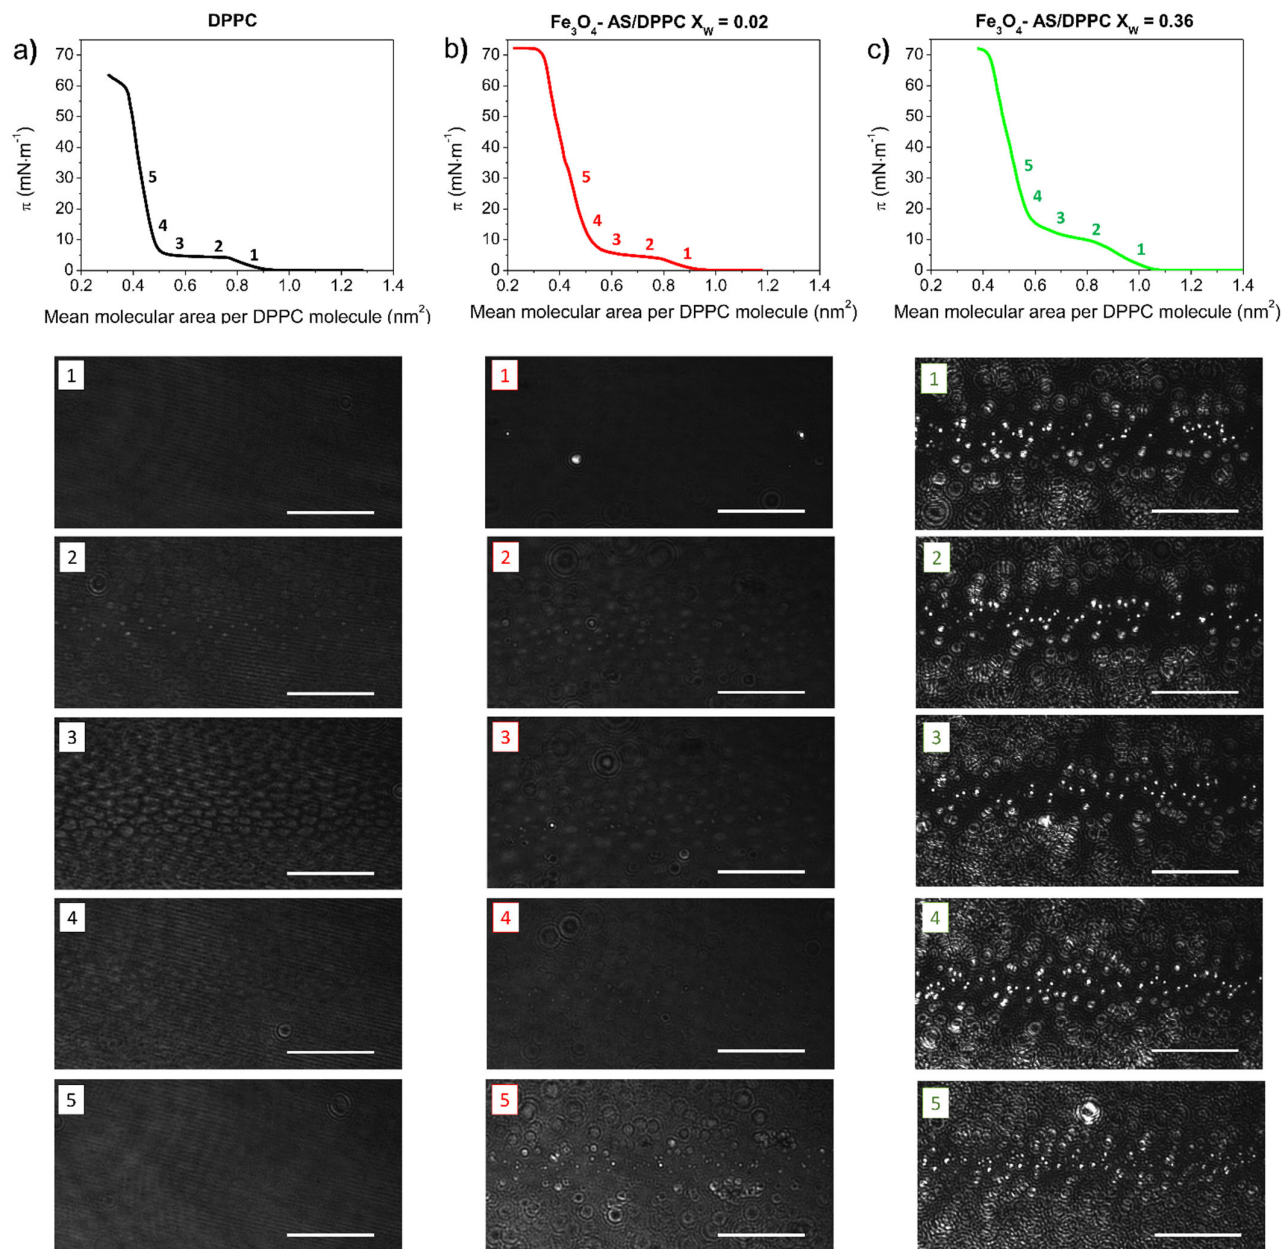

**Figure S1.** Brewster angle microscope images recorded during compression of the DPPC film (a) and  $\text{Fe}_3\text{O}_4$ -AS/DPPC monolayers with  $X_W=0.02$  (b) and  $X_W=0.36$  (c). Length of scale bar in BAM images—100  $\mu\text{m}$ .
